# Supplementary material
Source: PubMed Central journal article supplement (PMC2393819)

|                                          | Buffer control | 1%DMSO control | 10 $\mu$ M IAA | 10 $\mu$ M PBA | 400 $\mu$ M NPA | 50 $\mu$ M TIBA |
|------------------------------------------|----------------|----------------|----------------|----------------|-----------------|-----------------|
| Velocity ( $\mu$ m/sec)<br>Mean $\pm$ SD | 3.9 $\pm$ 0.5  | 3.8 $\pm$ 0.3  | 3.8 $\pm$ 0.3  | 4.0 $\pm$ 0.4  | 4.0 $\pm$ 0.4   | 3.6 $\pm$ 0.2   |

N=10 in each chemical

*in vitro* myosin motility assay

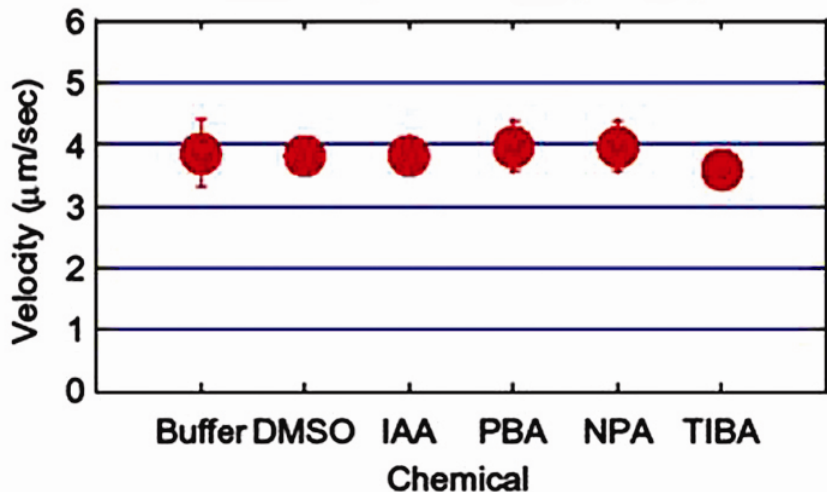

Supplement: pnas_0711414105_6.pdf [file pnas_0711414105_6.pdf]
