# Supplementary material
Source: PubMed Central journal article supplement (PMC2393819)
Supplement: pnas_0711414105_7.pdf [file pnas_0711414105_7.pdf]

**A**

|                                                       | Buffer control            | 1% DMSO control           | 10 $\mu$ M PBA             | 50 $\mu$ M TIBA            |
|-------------------------------------------------------|---------------------------|---------------------------|----------------------------|----------------------------|
| Length of actin filaments ( $\mu$ m)<br>Mean $\pm$ SD | 0.24 $\pm$ 0.09<br>(N=96) | 0.22 $\pm$ 0.06<br>(N=93) | 0.29 $\pm$ 0.05<br>(N=104) | 0.22 $\pm$ 0.05<br>(N=123) |

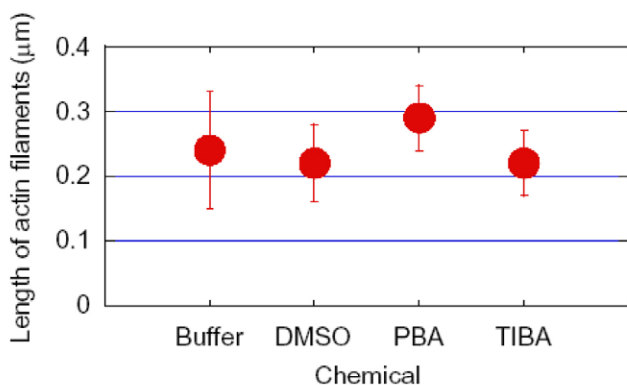

*in vitro* actin polymerization assay

**B**

|                                              | Buffer control | 0.1% DMSO control | 1% DMSO control | 10 $\mu$ M PBA | 50 $\mu$ M TIBA |
|----------------------------------------------|----------------|-------------------|-----------------|----------------|-----------------|
| Actin concentration ( $\mu$ M) sup (G-actin) | 2.5            | 2.9               | 2.7             | 2.2            | 2.3             |
| Actin concentration ( $\mu$ M) ppt (F-actin) | 19.6           | 19.6              | 19.6            | 19.6           | 19.5            |
| F-actin / total actin                        | 0.887          | 0.871             | 0.879           | 0.899          | 0.894           |
