# Supplementary material
Source: PubMed Central journal article supplement (PMC2393819)

**A**

control

Benzoic Acid  
100  $\mu$ M

GFP-actin

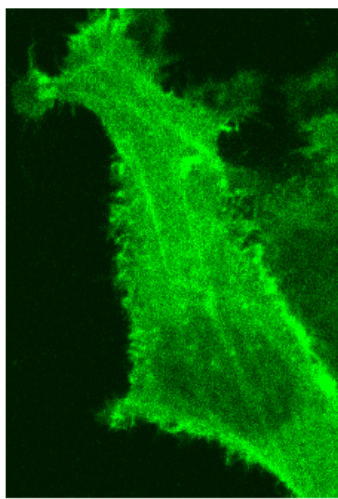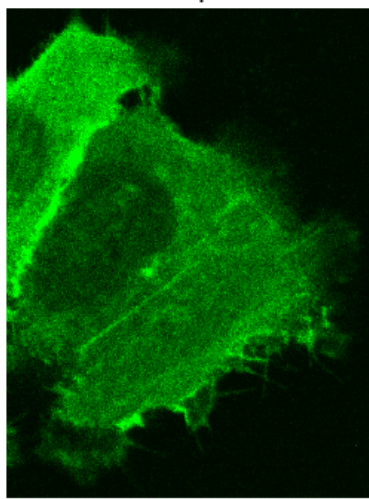**B**

control

Benzoic Acid  
50  $\mu$ MBenzoic Acid  
100  $\mu$ MBenzoic Acid  
200  $\mu$ M

Abp140-GFP

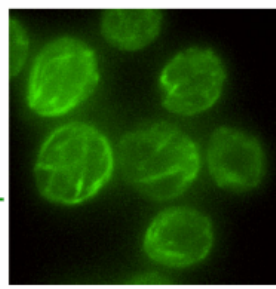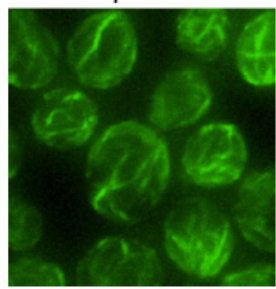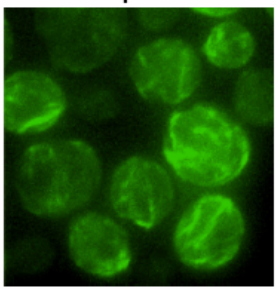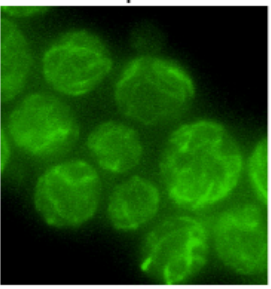

Supplement: pnas_0711414105_11.pdf [file pnas_0711414105_11.pdf]
