# Supplementary material
Source: PubMed Central journal article supplement (PMC2393819)

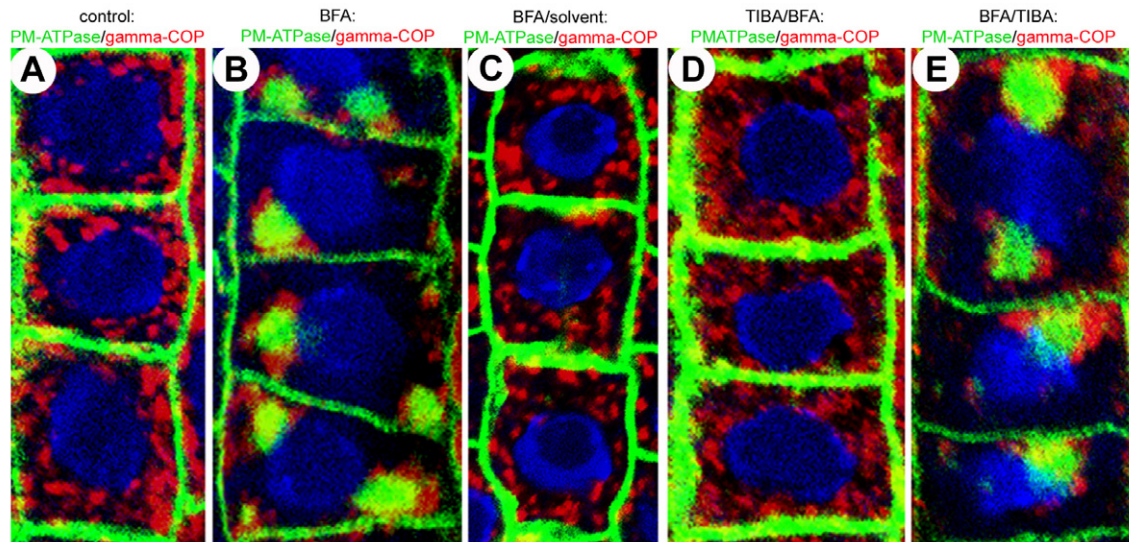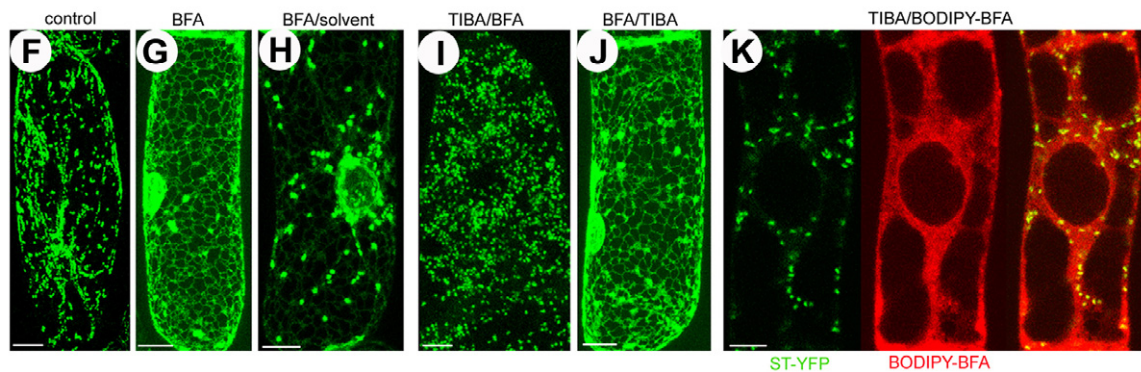

Supplement: pnas_0711414105_1.pdf [file pnas_0711414105_1.pdf]

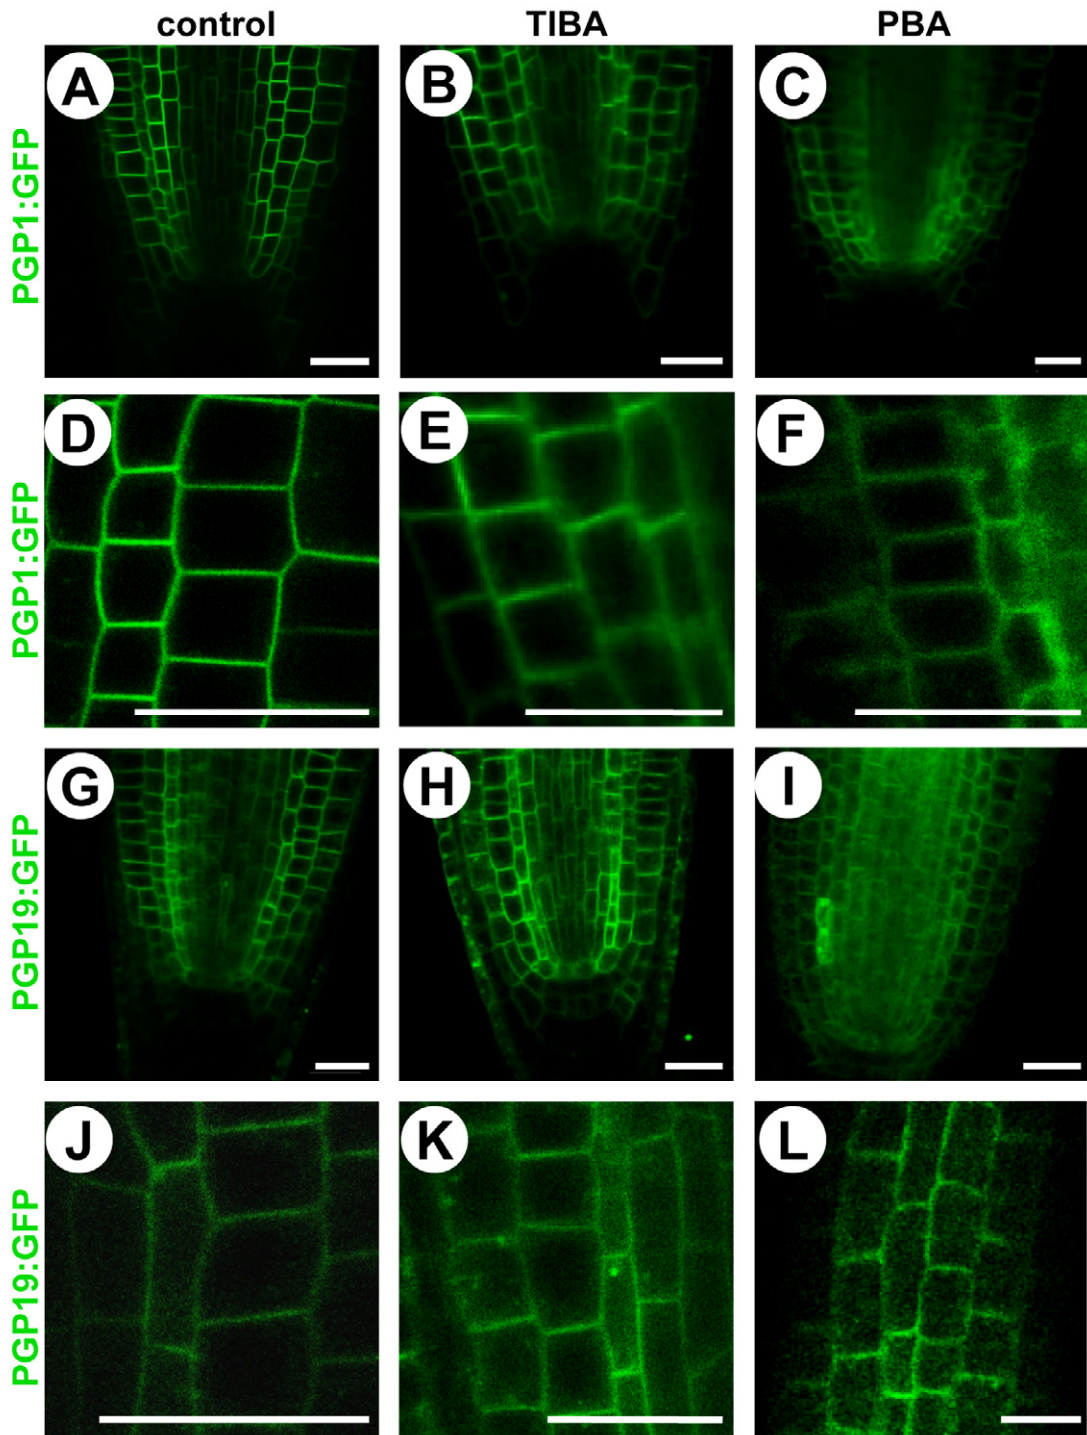

Supplement: pnas_0711414105_10.pdf [file pnas_0711414105_10.pdf]

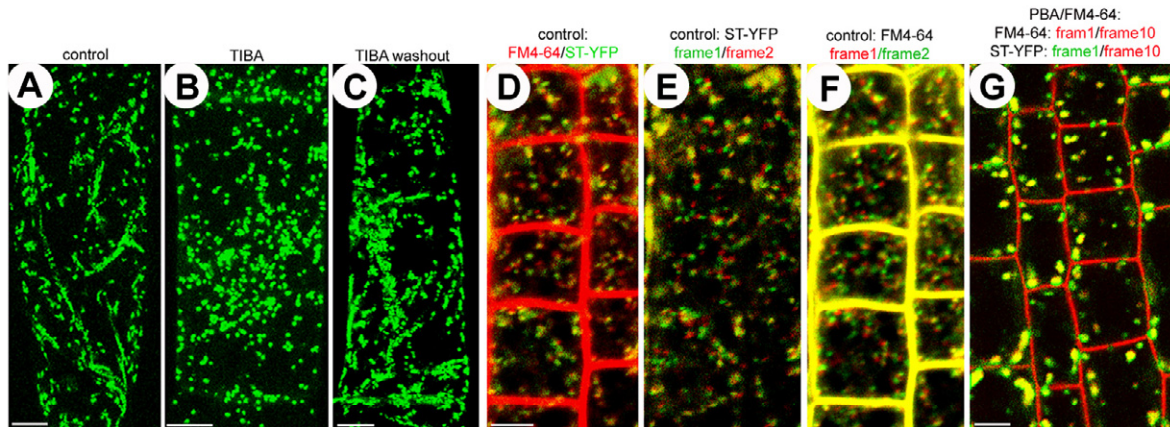

TIBA: organelles

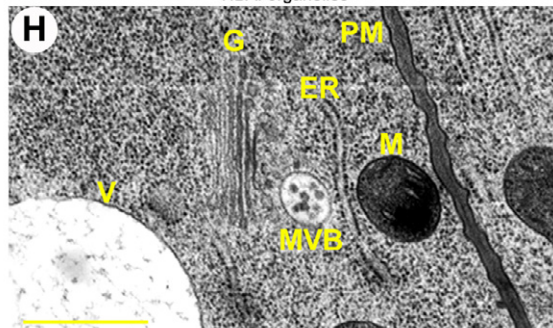

TIBA: cytoskeleton

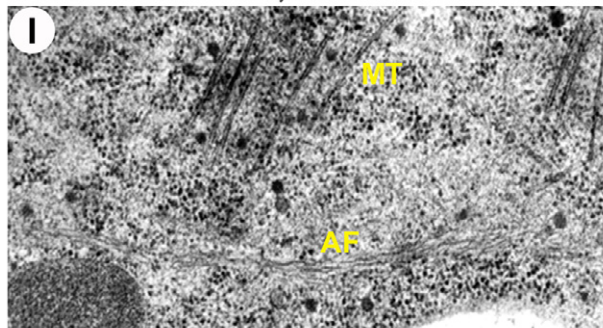

Supplement: pnas_0711414105_2.pdf [file pnas_0711414105_2.pdf]

control

PBA

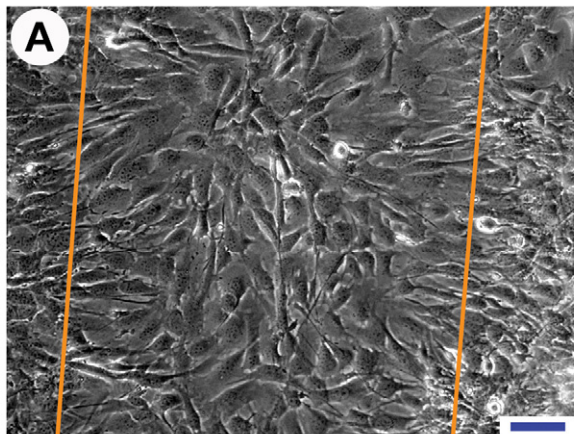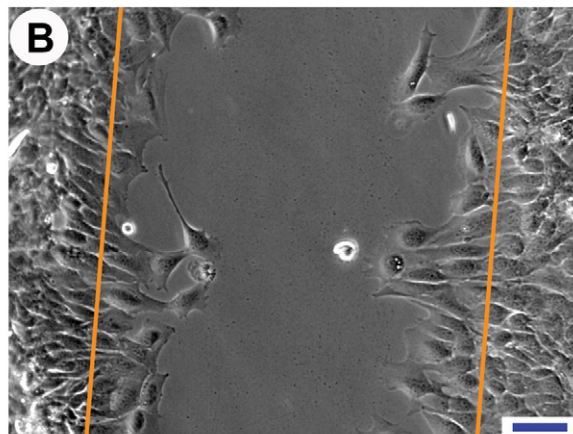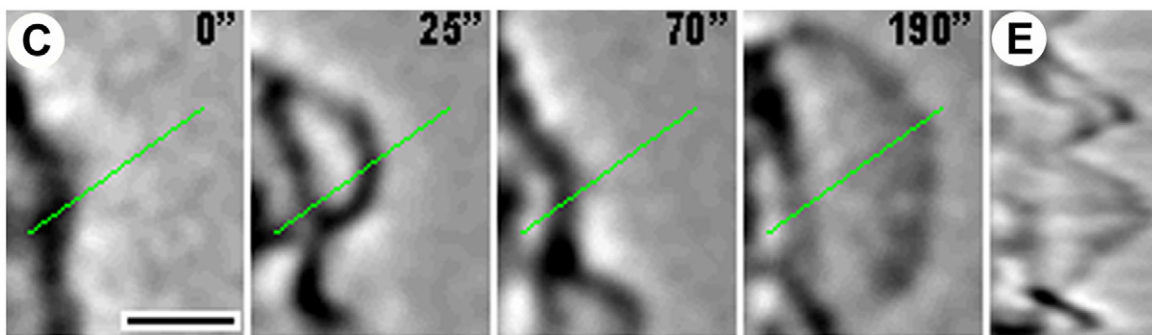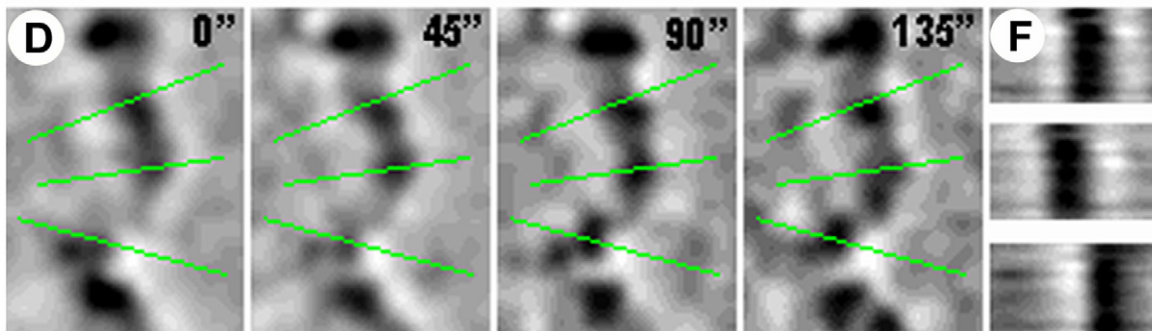

Supplement: pnas_0711414105_3.pdf [file pnas_0711414105_3.pdf]

control

Lat B

Jasp./Lat B

PBA/Lat B

TIBA/Lat B

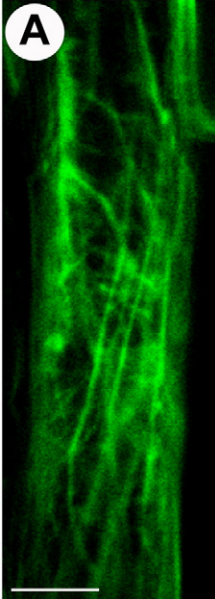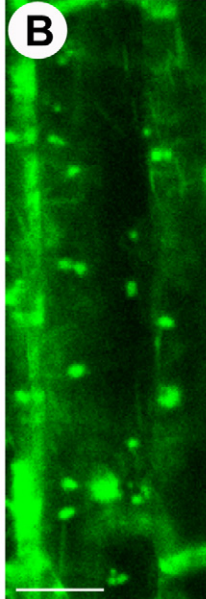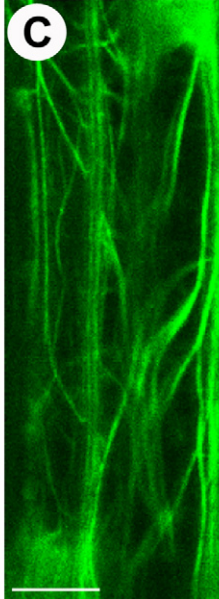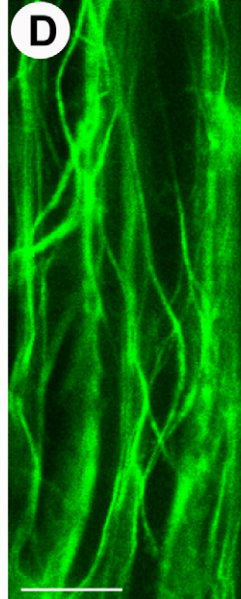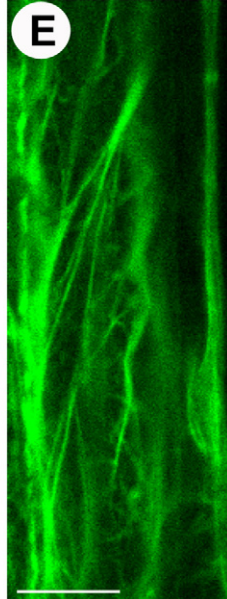

Supplement: pnas_0711414105_4.pdf [file pnas_0711414105_4.pdf]

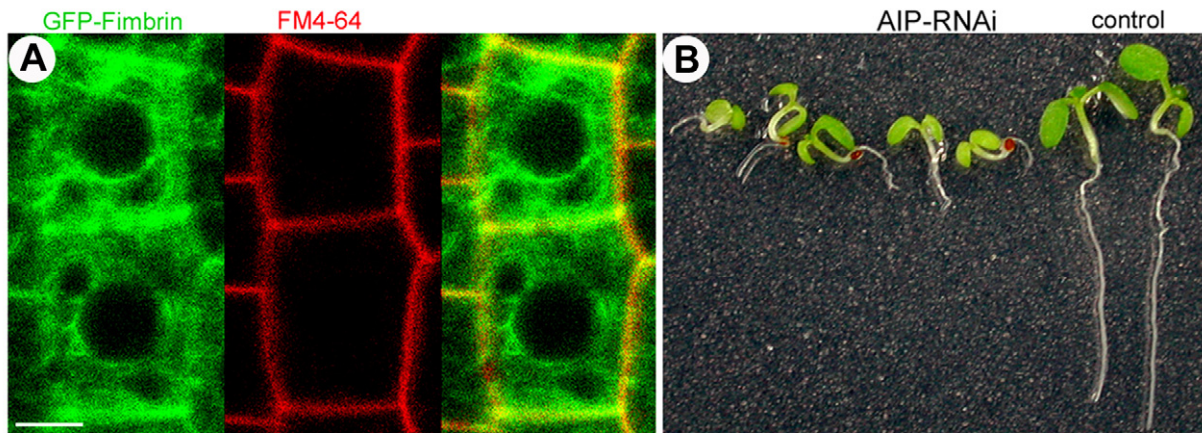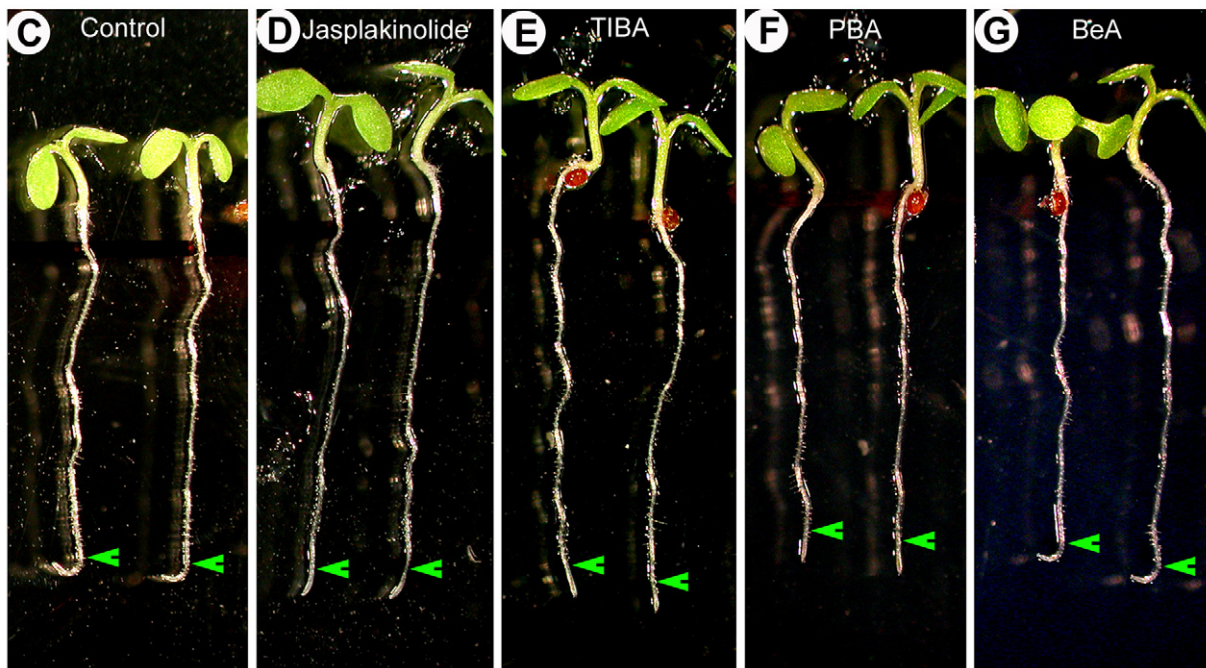

Supplement: pnas_0711414105_5.pdf [file pnas_0711414105_5.pdf]

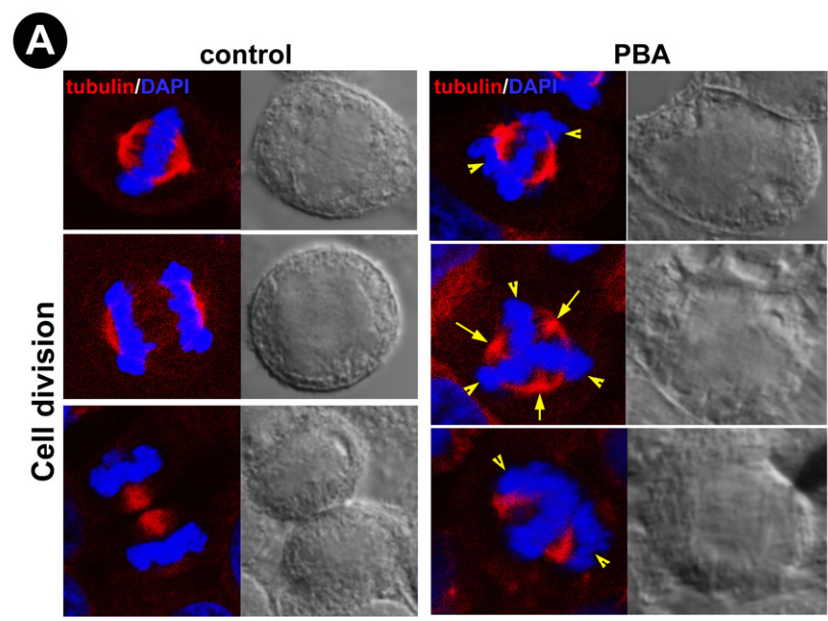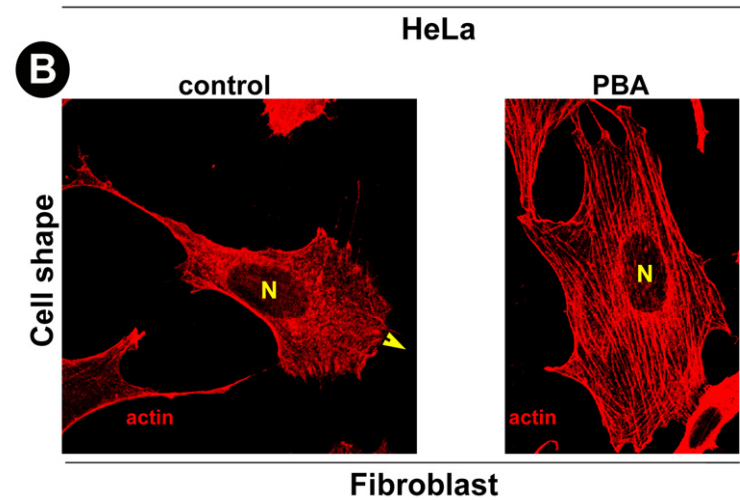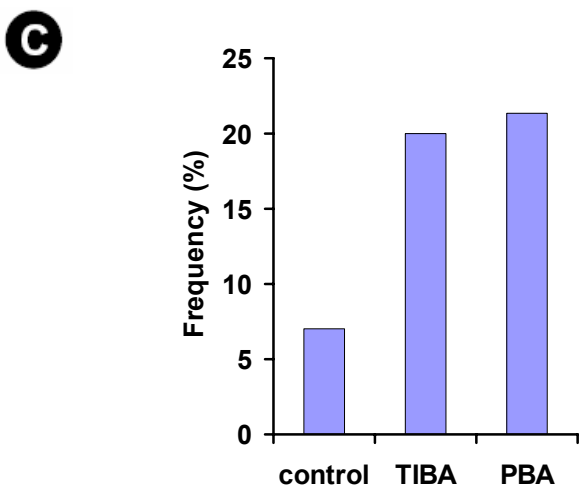

Supplement: pnas_0711414105_8.pdf [file pnas_0711414105_8.pdf]

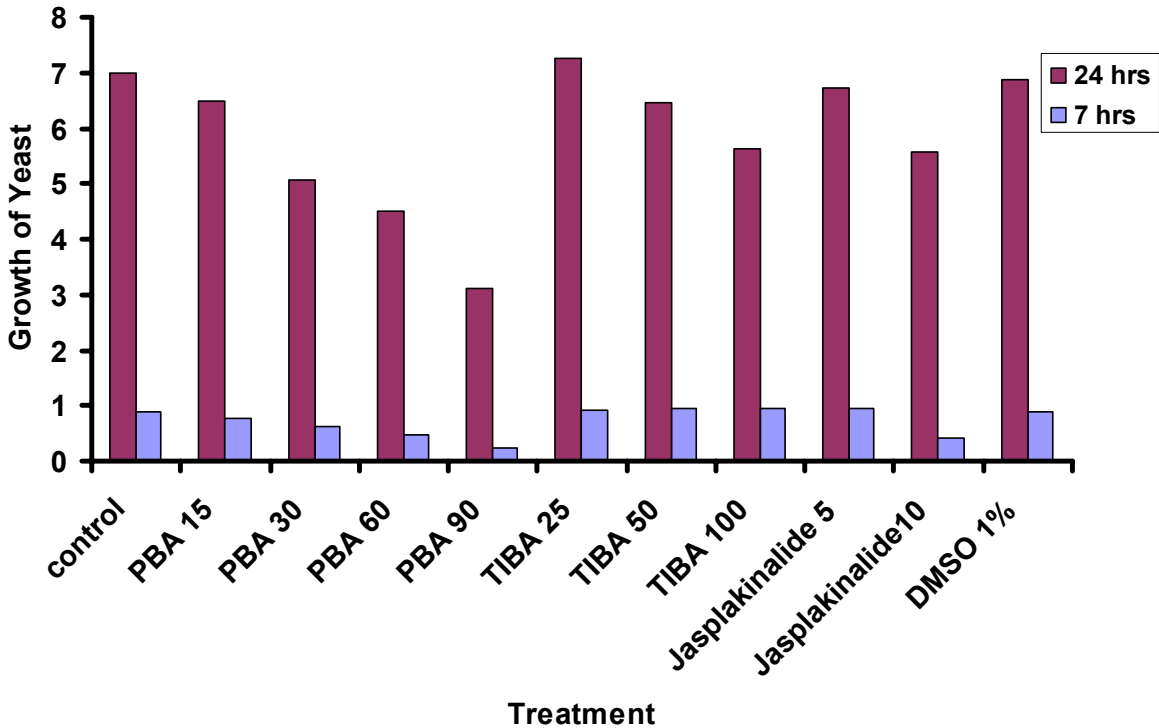

Supplement: pnas_0711414105_9.pdf [file pnas_0711414105_9.pdf]
